# 1 Spatiotemporal Variations of "Triple-demic" Outbreaks of 2 Respiratory Infections in the United States in the Post-COVID-19 3 Era

4 Wei Luo<sup>1\*a, b</sup> PhD, Qianhuang Liu<sup>1a</sup> BSc, Yuxuan Zhou<sup>1a, c</sup> MSc, Yiding Ran<sup>a</sup> BSc,  
5 Zhaoyin Liu<sup>a</sup> MSc, Weitao Hou<sup>d</sup> BSc, Sen Pei<sup>e</sup> PhD, Shengjie Lai<sup>\*f</sup> PhD

6 a. GeoSpatialX Lab, Department of Geography, National University of Singapore,  
7 Singapore

8 b. Saw Swee Hock School of Public Health, National University of Singapore, Singapore

9 c. Department of Urban Planning and Design, Urban Systems Institute, And the Social  
10 Infrastructure for Equity and Wellbeing Lab, The University of Hong Kong, Hong Kong  
11 Special Administrative Region of China

12 d. Department of Biological Sciences, National University of Singapore, Singapore

13 e. Department of Environmental Health Sciences, Mailman School of Public Health,  
14 Columbia University, New York, USA

15 f. WorldPop, School of Geography and Environmental Science, University of Southampton,  
16 SO17 1BJ, UK

17

18 <sup>1</sup>These author contributed equally.

19 \*Corresponding authors:

20 Wei Luo,

21 Email: [geowl@nus.edu.sg](mailto:geowl@nus.edu.sg)

22 Postal Address: 1 Arts Link, #04-32 Block AS2, Singapore 117570

23 Phone Number: (65) 6516-3851

24 Shengjie Lai,

25 Email: [Shengjie.Lai@soton.ac.uk](mailto:Shengjie.Lai@soton.ac.uk)

26

## 27 **Summary**

28 **Objectives:** The United States confronted a "triple-demic" of influenza, respiratory syncytial  
29 virus, and COVID-19 in the winter of 2022, resulting in increased respiratory infections and a  
30 higher demand for medical supplies. It is urgent to analyze each epidemic and their  
31 co-occurrence in space and time to identify hotspots and provide insights for public health  
32 strategy.

33 **Methods:** We used retrospective space-time scan statistics to retrospect the situation of  
34 COVID-19, influenza, and RSV in 51 US states from October 2021 to February 2022, and  
35 then applied prospective space-time scan statistics to monitor spatiotemporal variations of  
36 each individual epidemic, respectively and collectively from October 2022 to February 2023.

37 **Results:** Our analysis indicated that compared to the winter of 2021, COVID-19 cases  
38 decreased while influenza and RSV infections increased significantly during the winter of  
39 2022. We revealed that a twin-demic high-risk cluster of influenza and COVID-19 but no  
40 triple-demic clusters emerged during the winter of 2021. We further identified a large  
41 high-risk cluster of triple-demic in the central US from late November, with COVID-19,  
42 influenza, and RSV having relative risks of 1.14, 1.90, and 1.59, respectively. The number of  
43 states at high risk for multiple-demic increased from 15 in October 2022 to 21 in January  
44 2023.

45 **Conclusion:** Our study provides a novel spatiotemporal perspective to explore and monitor  
46 the transmission patterns of the triple epidemic, which could inform public health authorities'  
47 resource allocation to mitigate future outbreaks.

48

## 49 **Keywords**

50 COVID-19, Influenza, RSV, Space-time clusters, Surveillance

51

## 52 **1 Introduction**

53 Since December 2019, the COVID-19 pandemic has had a catastrophic impact not only  
54 on public health but also on social and economic activities<sup>1</sup>. Despite the implementation of  
55 non-pharmaceutical interventions (NPIs), the availability of effective vaccines, and antiviral  
56 therapies<sup>2,3</sup>, it is still a significant challenge to contain the spread of COVID-19<sup>4,5</sup>. The  
57 emergence of highly transmissible variants of SAR-CoV-2<sup>6</sup> and the waning protections  
58 conferred by vaccines and infection have increased the likelihood of new waves of  
59 COVID-19 outbreaks during the typical influenza season<sup>7</sup>. The COVID-19 restrictions over  
60 the first two years have not only suppressed the spread of influenza<sup>8</sup> and RSV infections<sup>9</sup>, but  
61 also led to a lack of recent immune responses against them<sup>10</sup>. Consequently, the easing of  
62 COVID-19 restrictions might create an ideal environment for the "triple-demic" to  
63 co-circulate in the population, potentially leading to a more significant outbreak of influenza  
64 and RSV. In the winter of 2022, the Centers for Disease Control and Prevention (CDC)  
65 warned of the "triple-demic", which refers to the simultaneous occurrence of COVID-19,  
66 influenza, and respiratory syncytial virus (RSV)<sup>11</sup>. Infections caused by these three  
67 respiratory diseases reached an unexpected number, occurring abnormally ahead of the  
68 typical, pre-pandemic season spike of respiratory infections<sup>12</sup>.

69 The "triple-demic" seriously challenges the public health system due to their similar  
70 transmission characteristics, clinical manifestations, and cumulative disease burden<sup>13,14</sup>. For  
71 example, this "triple-demic" has overwhelmed many hospitals, leading to disrupted  
72 attendance at schools, daycares, and workplaces in the US<sup>15</sup>. As of October 2022,  
73 hospitalizations of infants younger than six months have reached a record high due to the  
74 emergence of RSV, with one in every 70 babies requiring hospitalization<sup>16</sup>. Additionally,  
75 influenza caused the highest hospital admission rates for a decade<sup>17</sup>. Meanwhile, COVID-19  
76 cases have also resurged in most states, resulting in higher hospitalization rates<sup>18</sup>. Despite the  
77 limited time available for studying its origin, scale, and severity<sup>19</sup>, scholars have investigated  
78 the impact of COVID-19 and influenza co-circulation on prevalence, outcomes, and  
79 burden<sup>20-22</sup>. However, existing studies on the "triple-demic" are mainly clinical and overlook  
80 the general patterns of disease occurrence across space and time. It is therefore essential to  
81 analyze each epidemic and their co-occurrence to identify the most affected regions and  
82 provide valuable insights into how the "triple-demic" outbreaks relate to each other in space  
83 and time.

84 Space-time scan statistics (STSS) is one of the most common techniques for identifying  
85 disease clusters that characterize an outbreak, which has been widely employed in studying  
86 diseases including COVID-19<sup>23</sup>, influenza<sup>24</sup>, dengue fever<sup>25</sup> and diabetes<sup>26</sup>. Moreover,  
87 multivariate STSS can further identify space-time clusters of multiple diseases that occur  
88 simultaneously<sup>27,28</sup>. Our study used STSS to identify spatiotemporal propagation and clusters  
89 of the emerging “triple-demic” in 51 US states. By comparing the relative risks of three  
90 infectious diseases, respectively and collectively, at the state level, our findings can  
91 contribute to understanding the scale and severity of the “triple-demic”, empowering  
92 researchers and relevant authorities to closely monitor threats to the healthcare system and  
93 formulate data-driven policies with greater precision. Ultimately, this research can facilitate  
94 better preparation and management for future public health crises.

## 95 **2 Data and Methods**

### 96 **2.1 Data**

97 The peak of RSV and influenza occurred unusually early in around November 2022 and  
98 a new wave of COVID-19 emerged synchronously in the US (Figure 1)<sup>29</sup>. We focused on the  
99 three respiratory diseases in 50 states and Washington D.C. from October 1<sup>st</sup>, 2022, to  
100 February 28<sup>th</sup>, 2023, covering the outbreaks of “triple-demic” and used the data from October  
101 1<sup>st</sup>, 2021, to February 28<sup>th</sup>, 2022 for comparison. Given the absence of significant variations  
102 in patterns between January and February 2023, we mainly focused on the situation before  
103 February in the main text and relegated the outcomes of February to the Appendix (Table A1  
104 & A2, Figure A1). Specifically, the COVID-19 confirmed cases, influenza cases, and  
105 diagnostic tests for RSV by testing type (i.e., PCR and Antigen) were collected from the  
106 Johns Hopkins University's Center for Systems Science and Engineering GIS dashboard<sup>30</sup>,  
107 CDC FluView database<sup>31</sup>, and National Respiratory and Enteric Virus Surveillance System  
108 (NREVSS)<sup>32</sup>, respectively. The influenza case was determined by the ratio of influenza-like  
109 illness cases to all outpatient visits to sentinel physicians, multiplied by the proportion of  
110 positive respiratory viral isolates for a specific strain, weighted by the state populations<sup>33</sup>.

$$111 \quad Flu_i = \frac{ILL_i}{OV_i} \times Positive_i \times \frac{Pop_i}{Pop_{US}} \quad (1)$$

112 Where  $ILL_i$  is influenza-like illness cases in state  $i$ ,  $OV_i$  is outpatient visits to sentinel  
113 physicians in state  $i$ ,  $Positive_i$  is proportion of positive respiratory viral isolates for a

114 specific strain in state  $i$ ,  $Pop_i$  is population in state  $i$  and  $Pop_{US}$  is total population in the  
 115 US.

116 Notably, RSV data for seven states (Arkansas, Delaware, Washington D.C., New  
 117 Hampshire, Rhode Island, Utah and Wyoming) were not available due to insufficient lab  
 118 reporting of testing data. Moreover, we multiplied the positivity percentages and the total  
 119 tests to obtain the approximate RSV cases in 44 states. Population data of 2022 in each state  
 120 was obtained from the American Community Survey (ACS)<sup>34</sup>.

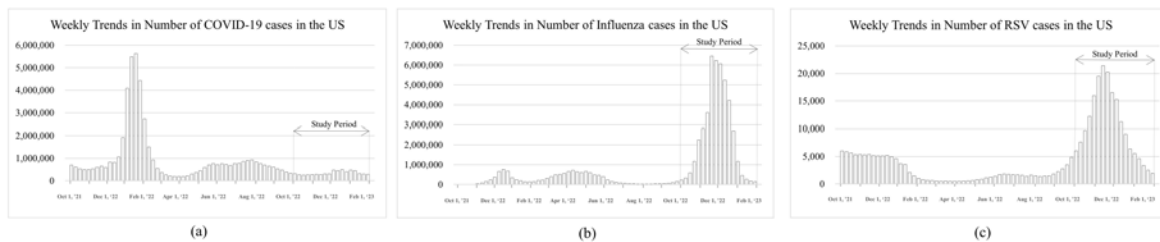

121  
 122 **Figure 1. Temporal distribution of COVID-19, influenza, and RSV in the US from October 2021 to**  
 123 **January 2023.**

## 124 2.2 Space-Time Scan Statistics Method

125 In this study, we utilized the univariate and retrospective multivariate STSS to identify  
 126 space-time clusters of COVID-19, influenza, and RSV, respectively, during the winter of  
 127 2021<sup>35</sup>. Subsequently, we utilized the univariate and multivariate prospective STSS to  
 128 monitor the spatiotemporal progression of each epidemic and the potential triple-demic  
 129 outbreak based on one-month interval during the winter of 2022<sup>36</sup>. We assumed that weekly  
 130 cases of the three epidemics follow the Poisson distribution, proportional to the at-risk  
 131 population in the United States. The null hypothesis was an inhomogeneous Poisson process  
 132 with an intensity  $\mu$ . The alternative hypothesis was the number of cases exceeding the  
 133 expected number, which was calculated by multiplying the population of the state by the  
 134 national incidence rate of the disease, as derived from the null model. We used the maximum  
 135 likelihood ratio test, calculated by Equation (2), to evaluate the null and alternative  
 136 hypotheses:

$$137 \frac{L(Z)}{L_0} = \frac{\binom{n_Z}{\mu(Z)} n_Z \binom{N-n_Z}{N-\mu(Z)}^{N-n_Z}}{\left(\frac{N}{\mu(A)}\right)^N} \quad (2)$$

138 Here,  $L(Z)$  represents the likelihood function for cylinder  $Z$ , while  $L_0$  represents the

---

139 likelihood function for the null hypotheses for cylinder  $Z$ . The likelihood ratio is calculated  
140 as the observed cases in a cylinder  $n_Z$  divided by the expected cases  $\mu$  in a cylinder  $Z$  to  
141 the power of the observed  $n_Z$ , multiplied by the observed cases outside the cylinder divided  
142 by the expected cases outside the cylinder. The numerator is then divided by the quotient of  
143 the total number of observed cases for the entire study area  $N$  across all time periods  $A$  to  
144 the power of the total number of observed cases. If the likelihood ratio is greater than 1, the  
145 cylinder will have an elevated risk. The space-time scan statistic uses different cylinder sizes,  
146 and the cylinder with the highest likelihood ratio (maximum) is the most likely cluster.

147 To identify the co-occurrence of disease outbreaks during our study period, we used the  
148 multivariate space-time Poisson scan statistic<sup>36</sup>. We computed the log-likelihood ratio (LLR)  
149 for each disease within each cylinder. The multivariate statistic sums the LLRs for different  
150 variables in a particular cylinder, producing a new LLR for that cylinder. Finally, the cluster  
151 with maximum summed LLR is reported as the most likely cluster, which is calculated by  
152 Equation (3):

$$153 \quad T = \underset{Z}{max} \sum_i LLR_i(Z) \quad (3)$$

154 Where  $T$  is the most likely cluster within cylinder  $Z$  for a particular disease  $i$ .

155 In space-time analyses, two parameters were defined for cluster specification: the  
156 maximum spatial cluster size within the spatial window and the maximum temporal cluster  
157 size within the temporal window. Given the variation in population densities across the  
158 United States, the spatial cluster size was restricted to 30% of the population at risk. Spatial  
159 clusters were also defined to cover 25% and 35% of the total population at risk. However, for  
160 35% of the total population at risk, SaTScan generated clusters that were excessively large  
161 and had relatively small relative risks (RR) when compared to those generated by using 30%  
162 of the total population at risk. On the other hand, for 25% of the total population at risk, the  
163 number of clusters was greater than that generated by using 30% of the total population at  
164 risk. The total number of observed cases and expected cases were the same for both clusters,  
165 which indicates that the maximum cluster size was sufficiently limited by 30% of the  
166 population at risk. The analyses were conducted using a maximum spatial cluster size of 30%  
167 of the population at risk in the spatial window and a maximum temporal cluster size of 50%  
168 of the study period in the temporal window. Moreover, we set a minimum of two cases in  
169 each cluster to ensure the presence of at least two cases in each cluster and employed

---

170 one-week time aggregation for continuous monitoring. Monte Carlo simulations were  
171 conducted ( $n = 999$ ) for each model run to evaluate the statistical significance, and clusters  
172 with a  $p$ -value less than 0.05 and no geographical overlap were subsequently reported as most  
173 likely and secondary clusters. Our analysis was conducted in SaTScan<sup>TM37,38</sup>.

174 Additionally, we mapped the spatiotemporal dynamics of states with multiple-demic  
175 risks based on the relative risk (RR) to illustrate the propagation of triple-demic at state level  
176 during the winter of 2022. RR is a measure of the likelihood of contracting the disease in a  
177 location compared to all other locations, which is calculated as:

$$178 \quad RR = \frac{c/e}{(C-c)/(C-e)} \quad (4)$$

179 Where  $c$  is the total number of observed cases in a state,  $e$  is the total number of expected  
180 cases in a state, and  $C$  is the total number of observed cases in U.S. Specifically,  $RR > 1$   
181 denotes high-risk clusters with more observed cases than expected, while  $RR < 1$  indicates  
182 low-risk clusters.

### 183 **3 Results**

#### 184 **3.1 Spatiotemporal progression of respiratory infections in the US, Oct 2021-Feb 2023**

185 From October 2021 to February 2023, cases of COVID-19, influenza, and RSV in each  
186 state presented various dynamics over time (Figure 2). The number of COVID-19 cases  
187 experienced a dramatic growth in each state from January 2022, following which it showed a  
188 slight fluctuation from April to September 2022 and maintained at a relatively low level but  
189 not vanished during the winter of 2022. Additionally, several states in the central US have  
190 experienced potential multiple-demic risk during the winter of 2021 as the relatively high  
191 number of RSV cases and influenza cases (e.g., South Dakota, Wisconsin, Minnesota, Kansas,  
192 Idaho, etc.). Moreover, cases of influenza and RSV in many states saw noticeably sharp  
193 increases during the winter of 2023 despite the seasonal changes of the diseases, which  
194 resulted in the potential outbreak of triple-demic during the winter of 2023. The paired t-test  
195 result further showed that compared to the situation during the winter of 2021, the average  
196 number of COVID-19 cases in the whole country significantly decreased (change = -537315),  
197 while the average number of influenza cases (change = 733481) and RSV cases (change =  
198 2534) in the whole country significantly increased during the winter of 2022.



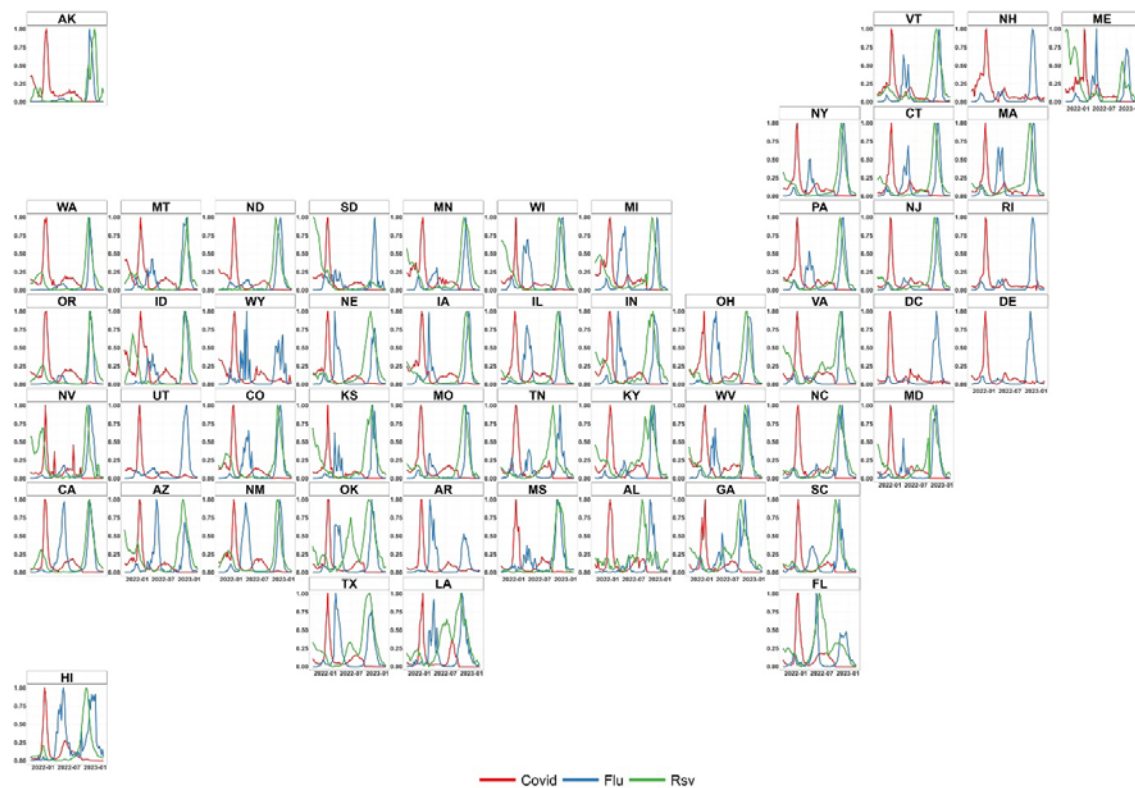

199  
200

**Figure 2. Spatiotemporal variation of respiratory infections in US from Oct-2021 to Feb-2023.**

201

**Table 1. Changes in cases of each respiratory infectious disease (2021 winter vs. 2022 winter).**

|                                       | COVID-19 (N=51)     | Influenza (N=51)    | RSV (N=44)     |
|---------------------------------------|---------------------|---------------------|----------------|
| <b>2021 Winter (T1) [Mean (SD)]</b>   | 673590 (103229)     | 97674 (18930)       | 1936 (539)     |
| <b>2022 Winter (T2) [Mean (SD)]</b>   | 136275 (22514)      | 831155 (149851)     | 4470 (944)     |
| <b>Difference (T2-T1) [Mean (SD)]</b> | -537315 (84041) *** | 733481 (133862) *** | 2534 (535) *** |

202  
203

Note: The paired t-tests were conducted to compare the number of cases for 2021 winter and 2022 winter. The results are labeled with asterisks in the rows showing the change: \*\*\*  $p < 0.001$ .

204

Table 2 summarizes the space-time clusters existing during the winter of 2021. The whole country experienced a severe COVID-19 situation in January 2022, with 3 high-risk clusters emerging in most states. Specifically, the most likely cluster (cluster 1), with the highest RR of 3.56, emerged in the western US, while 2 other high-risk clusters (RR=3.38, and RR=2.63) emerged in 28 eastern states (Table 2 & Figure 3a). As for influenza, a high-risk cluster (RR=3.32) emerged in 18 central and western states between November and December 2021, while an extremely low-risk cluster (RR=0.026) occurred in 16 eastern states from January to February 2022 (Table 2 & Figure 3b). Besides, 2 high risk clusters and 2 low-risk clusters of RSV emerged during the winter of 2021. Cluster 1, which had an extremely high RR of 28.32, was detected in Wisconsin from early October to early December 2021. This indicated that people living in Wisconsin were 28.32 times more likely

214



215 to be infected with RSV during this period. Additionally, another high-risk cluster (cluster 3,  
 216 RR=2.40) were identified in 17 western states between November and December 2021 (Table  
 217 2 & Figure 3c). However, 2 low-risk cluster (cluster 2 & 4) with an RR of 0.15 and 0.20,  
 218 respectively, were identified in the eastern US from the late December 2021 to February 2022,  
 219 indicating that the RSV situation mitigated in many eastern states during this period (Table 2  
 220 & Figure 3c).

221 For the retrospective situation of multiple demic risk during the winter of 2021, a  
 222 high-risk twin-demic cluster of RSV and influenza, with an RR of 2.85 and 3.22 for RSV and  
 223 influenza, respectively, occurred in 18 central and western states from November to  
 224 December 2021 (Figure 3d). This implied that the population within the cluster experienced  
 225 higher risk of both RSV and influenza infections. On the contrary, a low-risk twin-demic  
 226 cluster of RSV and influenza (RR of RSV=0.14, RR of influenza=0.062) occurred in 16  
 227 eastern states from January to February 2022, during which the situation of COVID-19  
 228 deteriorated, indicating that the twin-demic outbreak mitigated but COVID-19 outbreak  
 229 emerged during the late winter (Figure 3a & Figure 3d). In addition to twin-demic cluster of  
 230 RSV and influenza, no other types of twin-demic clusters and triple-demic clusters were  
 231 detected during the winter of 2021.

232 **Table 2. Space-time univariate clusters from October 2021 to February 2022.**

| Cluster                                   | Duration              | P value | Diseases  | Observed | Expected   | RR    | Total state (N) | States (RR>1) |
|-------------------------------------------|-----------------------|---------|-----------|----------|------------|-------|-----------------|---------------|
| <b>Univariate Clusters</b>                |                       |         |           |          |            |       |                 |               |
| 1                                         | 2022.01.02-2022.01.30 | <.001   |           | 6996730  | 2299721.36 | 3.56  | 19              | 13            |
| 2                                         | 2022.01.02-2022.01.30 | <.001   | COVID-19  | 6766183  | 2323910.95 | 3.38  | 12              | 7             |
| 3                                         | 2021.12.26-2022.01.23 | <.001   |           | 5466152  | 2305102.22 | 2.63  | 16              | 10            |
| 1                                         | 2021.10.31-2021.12.19 | <.001   | influenza | 11653850 | 4461591.52 | 3.22  | 18              | 11            |
| 2                                         | 2022.01.09-2022.02.27 | <.001   |           | 313501   | 4550893.75 | 0.062 | 16              | 4             |
| 1                                         | 2021.10.03-2021.12.12 | <.001   |           | 17299    | 759.69     | 28.32 | 1               | 1             |
| 2                                         | 2021.12.19-2022.02.27 | <.001   |           | 2242     | 12680.21   | 0.15  | 12              | 1             |
| 3                                         | 2021.10.31-2022.01.09 | <.001   | RSV       | 23819    | 11872.29   | 2.40  | 17              | 9             |
| 4                                         | 2021.12.26-2022.02.27 | <.001   |           | 2564     | 11434.16   | 0.20  | 16              | 4             |
| <b>Multivariate (Twin-demic) Clusters</b> |                       |         |           |          |            |       |                 |               |
| 1                                         | 2021.10.31-2021.12.19 | <.001   | RSV       | 21395    | 8967.83    | 2.85  | 18              | 11            |
|                                           |                       |         | influenza | 11653850 | 4461591.52 | 3.22  |                 | 12            |
| 2                                         | 2022.01.09-2022.02.27 | <.001   | RSV       | 1433     | 9147.33    | 0.14  | 16              | 4             |
|                                           |                       |         | influenza | 313501   | 4550893.75 | 0.062 |                 | 10            |

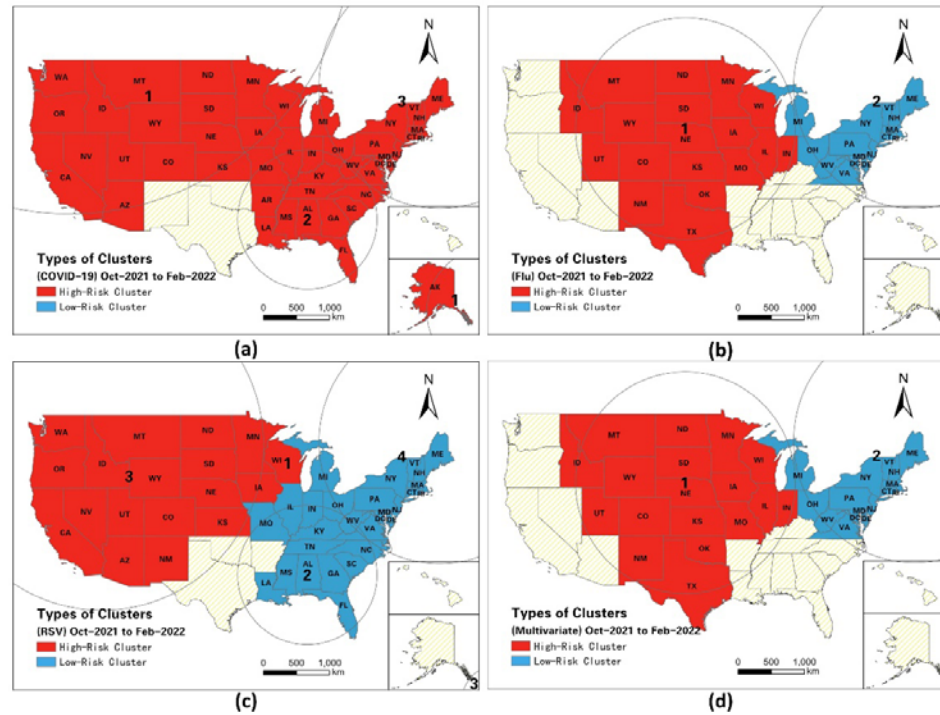

233  
234

Figure 3. Spatiotemporal Patterns of Retrospective Space-Time Clusters during the winter of 2021.

235

## 3.2 Spatiotemporal Propagation of Space-Time Clusters during the winter of 2022

236

### 3.2.1 Spatiotemporal Propagation of Univariate Clusters

237

238

239

240

241

242

243

244

245

246

247

248

249

250

251

Figure 4 present univariate space-time clusters that emerged between October 2022 and January 2023 at a one-month interval. In October, two clusters of high COVID-19 risk, had RR of 1.77 and 1.41, respectively, were found in the northeastern US (Figure 4a). Two high-risk influenza clusters with RR of 7.28 and 3.02 emerged in nineteen southeastern states, while a large low-risk cluster emerged in the western US (Figure 4e). Besides, five dispersed high-risk RSV clusters were identified in 13 US states, with Hawaii showing the highest relative risk (RR=9.60) (Figure 4i). In November, three COVID-19 clusters (RR=1.55, RR=1.88, and RR=1.19) were identified in five southwestern states and nine eastern states (Figure 4b), and all low-risk clusters of influenza dissipated and were succeeded by 2 high-risk clusters (RR=2.56 and RR=2.62) situated in the central and eastern regions of the US (Figure 4f). The high-risk cluster of RSV that was previously confined to the northeastern US expanded to encompass 10 additional western states, with an RR change from 5.80 to 3.47 (Figure 4j). In December, the situation deteriorated significantly as high-risk clusters of the three diseases proliferated. For high-risk COVID-19 clusters, in addition to the high-risk clusters in November, a new high-risk cluster were found in Louisiana, with an RR of 5.97

252 (Figure 4c). High-risk influenza clusters spread to the northern region (Figure 4g), and 3  
253 high-risk clusters emerged in Wisconsin (RR=9.31), Oregon (RR=6.94), and 3 states  
254 (Colorado, Nebraska and New Mexico) in the central US (RR=2.96) (Figure 4k). In January,  
255 most regions had low risk, but the eastern coast had persistent high-risk COVID-19 exposure  
256 (Figure 4d), and the high-risk cluster in Louisiana expanded to include Arkansas, Mississippi,  
257 and Alabama, with an RR changing to 1.67. The high-risk influenza cluster disappeared  
258 (Figure 4h), but high-risk RSV clusters remained in Wisconsin (RR=5.61) and Oregon  
259 (RR=4.67) (Figure 4i), with relief arriving by February (Table A1 & Figure A1). More details  
260 of the dynamics for univariate clusters during the winter of 2022 are show in table A3.

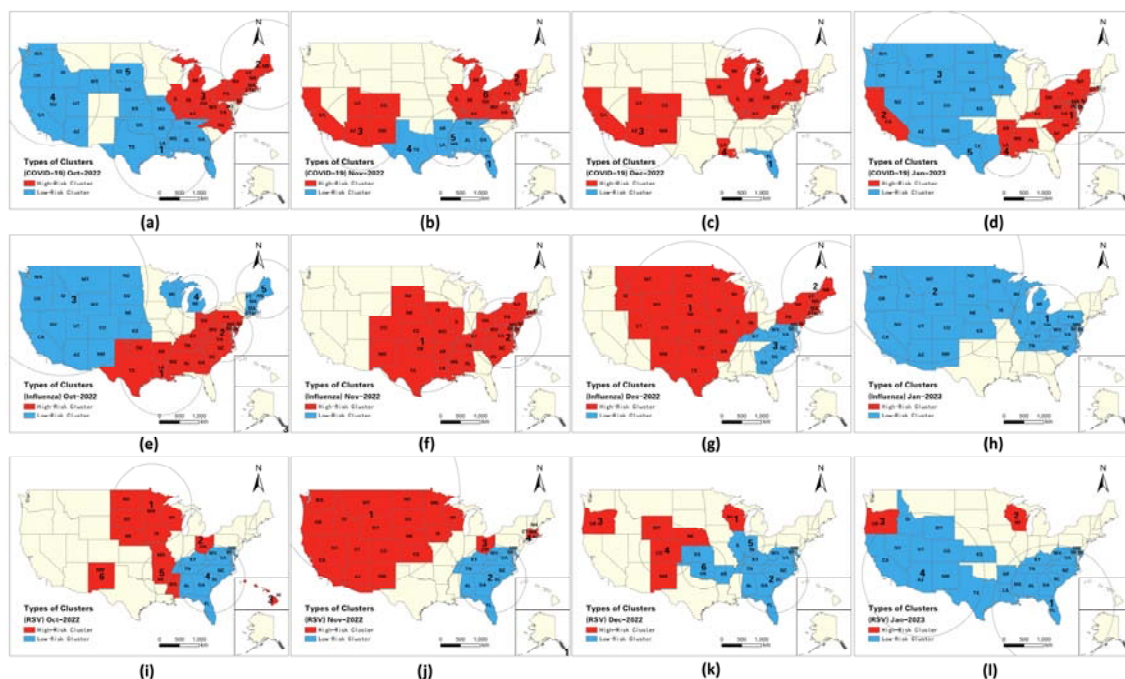

261  
262

**Figure 4. Spatiotemporal Patterns of Univariate Space-Time Clusters during the winter of 2022.**

### 263 3.2.2 Spatiotemporal Propagation of Multivariate Clusters

264 Table 3 and Figure 5 illustrate the spatiotemporal dynamics of multivariate space-time  
265 clusters. In late October, a high-risk twin-demic cluster consisting of eight southeastern states  
266 emerged (Figure 5a), exhibiting relatively high infection risks of both RSV (RR=1.05) and  
267 influenza (RR=7.28). Furthermore, a high-risk cluster of triple-demic comprising 11 eastern  
268 states emerged with an RR of 1.60 for RSV, 3.02 for influenza, and 1.41 for COVID-19,  
269 which raised concerns of triple-demic outbreaks in this region. In contrast, a large low-risk  
270 twindemic cluster of influenza and COVID-19 emerged in the western US, demonstrating  
271 relatively low risks of influenza (RR=0.58) and COVID-19 (RR=0.80) infections. In early

272 November and late November, two high-risk twindemic clusters surfaced. The first cluster  
 273 consisted of 15 states located in central and southern regions, with six states exhibiting  
 274 relatively high risks ( $RR > 1$ ) for RSV and seven states showing relatively high risks for  
 275 influenza (Figure 5b). This cluster had an RR of 1.26 for RSV and 2.56 for influenza. The  
 276 second cluster comprising 15 states in the eastern coastal regions of the US had an RR of 2.62  
 277 for influenza and 1.18 for COVID-19. From late November to December, a large high-risk  
 278 triple-demic cluster (cluster 1 in Figure 5c) emerged in the central US, evolving from the  
 279 previous twindemic cluster of RSV and influenza. This cluster had an RR of 1.59 for RSV,  
 280 1.90 for influenza, and 1.14 for COVID-19. Meanwhile, 9 states located in the eastern coast  
 281 formed a high-risk twindemic cluster of influenza ( $RR=2.13$ ) and COVID-19 ( $RR=1.56$ )  
 282 (cluster 2 in Figure 5c), indicating that individuals residing in the cluster experienced a high  
 283 risk of both influenza and COVID-19 infections. However, the southeastern US saw a low  
 284 risk twindemic cluster of RSV ( $RR=0.19$ ) and influenza ( $RR=0.39$ ), suggesting that the  
 285 situation of RSV and influenza had improved in these areas. Starting from early January, a  
 286 low-risk twindemic cluster of RSV ( $RR=0.12$ ) and COVID-19 ( $RR=0.10$ ), emerged in 13  
 287 states in the eastern US (cluster 1 in Figure 5d). This finding suggests that the triple-demic  
 288 situation had mitigated in these states between January 02, 2023 and the end of January.  
 289 Additionally, a low-risk triple-demic cluster emerged in 18 states in the western and central  
 290 regions with an RR of 0.61 for RSV, 0.10 for influenza, and 0.80 for COVID-19 (cluster 2 in  
 291 Figure 5d). Continued vigilance is needed as 11 states within the low-risk triple-demic cluster  
 292 still experienced a relatively high RR for influenza, another 11 states still had a relatively  
 293 high RR for RSV, and 4 states still had a relatively high RR for COVID-19.

294 **Table 3. Space-time multivariate clusters from October 2022 to January 2023 (RR = relative risk).**

| October 2022                 |                       |         |              |           |          |            |      |                 |               |
|------------------------------|-----------------------|---------|--------------|-----------|----------|------------|------|-----------------|---------------|
| Cluster                      | Duration              | P value | Type         | Diseases  | Observed | Expected   | RR   | Total state (N) | States (RR>1) |
| 1                            | 2022.10.24-2022.10.31 | <.001   | Twindemic    | RSV       | 4483     | 4296.65    | 1.05 | 8               | 3             |
|                              |                       |         |              | influenza | 2411008  | 500030.70  | 7.28 |                 | 7             |
|                              |                       |         |              | RSV       | 3606     | 2313.90    | 1.60 |                 | 4             |
| 2                            | 2022.10.31-2022.10.31 | <.001   | Triple-demic | influenza | 748172   | 269284.44  | 3.02 | 11              | 6             |
|                              |                       |         |              | COVID-19  | 81022    | 58419.84   | 1.41 |                 | 8             |
|                              |                       |         |              | influenza | 370929   | 616738.07  | 0.58 |                 | 1             |
| 3                            | 2022.10.24-2022.10.31 | <.001   | Twindemic    | COVID-19  | 109023   | 133798.08  | 0.80 | 15              | 6             |
|                              |                       |         |              |           |          |            |      |                 |               |
| October 2022 - November 2022 |                       |         |              |           |          |            |      |                 |               |
| Cluster                      | Duration              | P value | Type         | Diseases  | Observed | Expected   | RR   | Total state (N) | States (RR>1) |
| 1                            | 2022.11.07-2022.11.28 | <.001   | Twindemic    | RSV       | 19750    | 16166.08   | 1.26 | 15              | 6             |
|                              |                       |         |              | influenza | 6583436  | 3064396.37 | 2.56 |                 | 7             |
| 2                            | 2022.11.21-2022.11.28 | <.001   | Twindemic    | influenza | 3813598  | 1607061.06 | 2.62 | 14              | 8             |
|                              |                       |         |              | COVID-19  | 182326   | 156116.65  | 1.18 |                 | 11            |
| October 2022 - December 2022 |                       |         |              |           |          |            |      |                 |               |
| Cluster                      | Duration              | P       | Type         | Diseases  | Observed | Expected   | RR   | Total           | States        |

|                             |                       |         |              | value     |          |            |      | state (N)       | (RR>1)        |
|-----------------------------|-----------------------|---------|--------------|-----------|----------|------------|------|-----------------|---------------|
| 1                           | 2022.11.21-2022.12.26 | <.001   | Triple-demic | RSV       | 35155    | 23944.88   | 1.59 | 19              | 9             |
|                             |                       |         |              | influenza | 9256761  | 5476524.48 | 1.90 |                 | 10            |
|                             |                       |         |              | COVID-19  | 623345   | 555695.51  | 1.14 |                 | 9             |
| 2                           | 2022.11.21-2022.12.26 | <.001   | Twindemic    | influenza | 6138816  | 3135314.54 | 2.13 | 9               | 3             |
|                             |                       |         |              | COVID-19  | 474483   | 318136.11  | 1.56 |                 | 7             |
| 3                           | 2022.12.12-2022.12.26 | <.001   | Twindemic    | RSV       | 1170     | 5878.96    | 0.19 | 8               | 0             |
|                             |                       |         |              | influenza | 537311   | 1344600.13 | 0.39 |                 | 1             |
| October 2022 - January 2023 |                       |         |              |           |          |            |      |                 |               |
| Cluster                     | Duration              | P value | Type         | Diseases  | Observed | Expected   | RR   | Total state (N) | States (RR>1) |
| 1                           | 2023.01.02-2023.01.30 | <.001   | Twindemic    | RSV       | 1922     | 15150.41   | 0.12 | 13              | 1             |
|                             |                       |         |              | influenza | 366760   | 3316453.98 | 0.10 |                 | 3             |
|                             |                       |         |              | RSV       | 7909     | 12557.53   | 0.61 |                 | 11            |
| 2                           | 2023.01.02-2023.01.30 | <.001   | Triple-demic | influenza | 297871   | 2748867.62 | 0.10 | 18              | 11            |
|                             |                       |         |              | COVID-19  | 316667   | 391959.93  | 0.80 |                 | 4             |

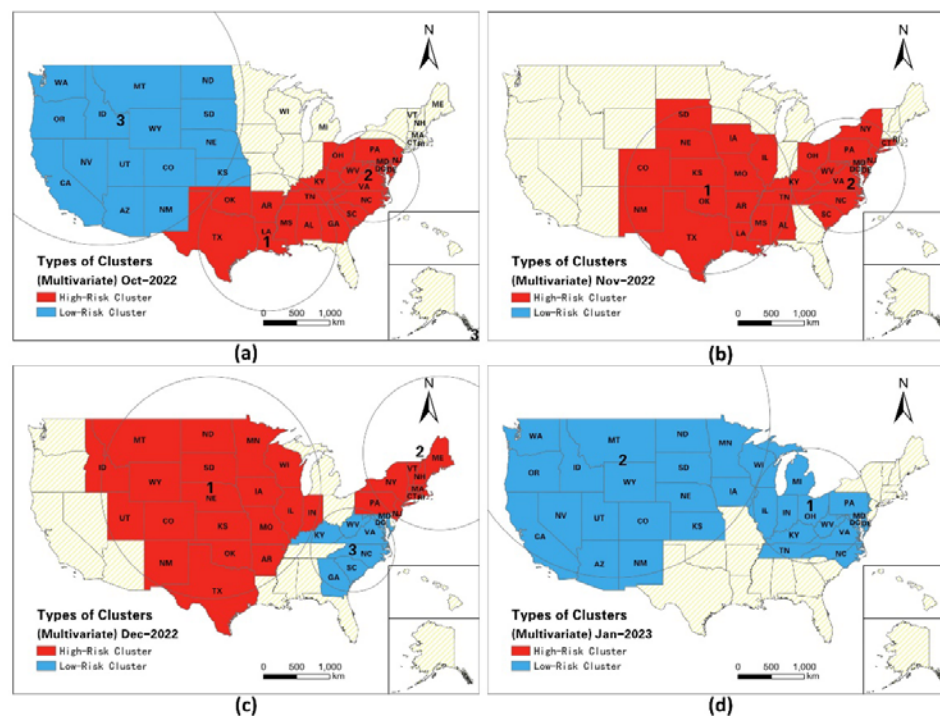

295

296

Figure 5. Spatiotemporal dynamics of Multivariate clusters.

### 297 3.3 Variations of States with Multiple-demic Risk

298 Table 4 illustrate the states with high RR ( $RR > 1$ ) for both or all three diseases at various  
 299 stages in winter of 2022. In October, 15 states in the eastern US demonstrated elevated risks  
 300 of twindemic or triple-demic, with nearly half of them being categorized as states with  
 301 twindemic risks of COVID-19 and RSV, while only 2 states, Kentucky and West Virginia,  
 302 were classified as states with triple-demic risks. As of November, the number of states with  
 303 twindemic or triple-demic risks increased to 18 in which 9 states exhibited twindemic risks of



304 COVID-19 and RSV, 2 states (Minnesota and West Virginia) demonstrated high triple-demic  
 305 risks, and 2 states (Mississippi and Washington) exhibited twindemic risks of flu and RSV.  
 306 However, the number of states with twindemic risks of COVID-19 and flu increased from 3  
 307 to 5, primarily located in the eastern US (Figure A2). In December, the situation deteriorated  
 308 for 22 states with twindemic or triple-demic risks. The numbers of states with risks of  
 309 triple-demic increased from 2 before December to 4 at this stage, namely Minnesota,  
 310 Nebraska, New Mexico, Ohio. The spatial pattern revealed that the twindemic or triple-demic  
 311 risks spread from east to west, with an increasing number of western states experiencing the  
 312 twindemic or triple-demic risks. Although 2 low-risk multivariate clusters emerged by the  
 313 end of Jan 2023 (Figure 5d), a total of 17 states had twindemic and 4 states had high risks of  
 314 triple-demic (i.e., New Mexico, North Dakota, Ohio) by the end of January (Figure A2d).

315 **Table 4. Summary of States with Multiple-demic Risk between October 2022 and January 2023.**

|                                       | October                                                                    | November                                                                                          | December                                                                          | January                                                             |
|---------------------------------------|----------------------------------------------------------------------------|---------------------------------------------------------------------------------------------------|-----------------------------------------------------------------------------------|---------------------------------------------------------------------|
| <b>Twindemic (COVID-19 &amp; Flu)</b> | Delaware, North Carolina, Tennessee                                        | Kentucky, New York, North Carolina, Pennsylvania, Tennessee                                       | Kentucky, New Jersey, New York, Oklahoma, Pennsylvania, Tennessee                 | Alabama, Louisiana, New Jersey, New York, Oklahoma, Tennessee       |
| <b>Twindemic (COVID-19 &amp; RSV)</b> | Connecticut, Minnesota, New Mexico, Ohio, Pennsylvania, Vermont, Wisconsin | Colorado, Connecticut, Delaware, Hawaii, Massachusetts, New Mexico, North Dakota, Ohio, Wisconsin | California, Colorado, Connecticut, Hawaii, Massachusetts, North Dakota, Wisconsin | California, Connecticut, Hawaii, Massachusetts, Wisconsin           |
| <b>Twindemic (Flu &amp; RSV)</b>      | Georgia, Mississippi, Texas                                                | Mississippi, Washington                                                                           | Iowa, Mississippi, Montana, Oregon, Washington                                    | Iowa, Minnesota, Mississippi, Montana, Nebraska, Oregon, Washington |
| <b>Triple-demic</b>                   | Kentucky, West Virginia                                                    | Minnesota, West Virginia                                                                          | Minnesota, Nebraska, New Mexico, Ohio                                             | New Mexico, North Dakota, Ohio                                      |

## 316 4 Discussion

### 317 4.1 Principal Findings

318 In this study, we applied univariate and multivariate STSS to retrospect the situation of  
 319 COVID-19, influenza, and RSV from October 2021 to January 2022, and identify emerging  
 320 clusters of “triple-demic” in the US from October 2022 to January 2023. To our knowledge,  
 321 this is the first study to provide a near real-time approach to study the spatiotemporal  
 322 variations of co-circulation of COVID-19, flu, and RSV in the US, thus providing evidence  
 323 for improving the surveillance and control of the emerging “triple-demic” situation.

324 Generally, the situation of influenza and RSV became more severe during the winter of  
 325 2022, with significant increase of confirmed cases, while the number of COVID-19 cases  
 326 maintained at a relatively low level during the winter of 2022 compared with the situation

327 during the winter of 2021. By using retrospective space-time cluster analysis, we identified 3  
328 high-risk clusters of COVID-19 during January 2022, a high-risk cluster of influenza from  
329 November to December 2021, and 2 high-risk cluster of RSV from October 2021 to January  
330 2022. Moreover, a high-risk twindemic cluster of influenza and RSV were detected in the  
331 central US from November to December 2021, while certain eastern states experienced  
332 relatively low risk of influenza and RSV outbreak in the late winter of 2021.

333 In terms of the prospective STSS results during the winter of 2022, the univariate  
334 space-time cluster analysis revealed that high-risk clusters of COVID-19 and flu were  
335 primarily concentrated in the eastern states between October 2022 and December 2022. The  
336 western states underwent a transition from low risk in October 2022 to high risk in December  
337 2022, and ultimately returned to low risk in January 2023. Throughout our study period,  
338 high-risk clusters of RSV were observed in various western and eastern states, with a  
339 particularly large cluster emerging in the western and central US during November. Notably,  
340 the southeastern regions experienced a sustained low risk of RSV throughout the winter of  
341 2022, while many southwestern states transitioned to low risk of RSV starting in early  
342 January 2023, indicating a gradual improvement in the situation.

343 The multivariate prospective analyses revealed that the southern US experienced a  
344 high-risk cluster of RSV and influenza from October to November 2022. In late October  
345 2022, a high-risk cluster of triple-demic emerged in the eastern US, which subsequently  
346 transitioned into a high-risk twindemic cluster of COVID-19 and influenza by late November  
347 2022. This indicates that many eastern states, particularly those on the eastern coast, were at a  
348 high-risk of exposure to both COVID-19 and influenza between October and November 2022,  
349 highlighting the need for greater concern and attention. Furthermore, our analysis identified a  
350 large high-risk cluster of triple-demic that emerged in the central US from late November  
351 2022. This suggests that 19 states were at a relatively high risk of experiencing triple-demic  
352 outbreaks. However, the situation of twindemic influenza and RSV in southeastern states  
353 began to improve from early December 2022. Additionally, the multiple-demic situation  
354 started to improve in many states from early January 2023. Noticeably, we found that the  
355 spatiotemporal patterns of multivariate clusters shared partial similarity with the univariate  
356 cluster of flu, which probably implies that flu overpowered the other two diseases.  
357 Throughout the winter of 2022, the number of states at high-risk for twindemic or  
358 triple-demic increased from October to the end of January, with a deteriorating trend from



359 east to west. We suppose that the emerging outbreak of multiple-demic in the winter of 2022  
360 was probably due to (1) a lack of recent immune responses to other virus after the public  
361 health interventions of COVID-19<sup>39</sup>; (2) inconsistent seasonal changes in meteorological  
362 factors which lead to increasing seasonal impacts of respiratory viruses<sup>40</sup>; (3) new strains of  
363 the pathogens which could evade previously established immune defenses<sup>9</sup>.

#### 364 **4.2 Strengths and Implications**

365 The advantage of this study over prior works is that we provided a novel insight for  
366 spatiotemporal surveillance of the dynamics and characteristics of the “triple-demic” at the  
367 state level in the US. During the winter of 2022, the “triple-demic” also strained healthcare  
368 system in Canada<sup>41</sup>, UK<sup>42</sup> and Singapore<sup>43</sup>. It is urgent to explore the extent of the impact of  
369 the three diseases and their modes of transmission. Our analysis can help monitor the  
370 “triple-demic” from spatiotemporal perspective, which can be also applied in other countries  
371 experiencing outbreaks of these three diseases. Additionally, our analysis provides insights  
372 for public health authorities to prioritize resource allocation and mitigate potential outbreaks  
373 of multiple epidemics worldwide. Since the concept of a "triple-demic" is a relatively new  
374 one and has not yet been experienced on a global scale, few studies have specifically  
375 examined the topic. Prior studies generally paid more attention to investigating the outbreak  
376 pattern of two out of three respiratory infections simultaneously<sup>44-46</sup>. For instance, during the  
377 COVID-19 pandemic in Australia, there were unusual and large outbreaks of RSV that  
378 persisted from spring to summer<sup>47</sup>.

379 Previous studies have generally found that the co-occurrence of multiple infectious  
380 diseases can have a compounding effect on public health outcomes, including increased  
381 illness, hospitalizations, and deaths<sup>48,49</sup>. Consistent with these findings, our study detected  
382 several states and clusters with high risks of two or three diseases, especially in the eastern  
383 US. This highlights the potential for an increased medical burden in these areas and  
384 guarantees greater attention. Hence, we should remain vigilant about the potential  
385 exacerbation of these three diseases. Our methods can also be used for further real-time  
386 monitoring to promptly detect the possible emergence of multiple-demic clusters. Our  
387 findings suggest that states that suffered from multiple-demic should prioritize the  
388 distribution of influenza vaccines. A viable suggestion at this stage is to prioritize the  
389 widespread distribution of vaccines and fully prepare the medical reserves to prevent  
390 overwhelming medical institutions. When vaccination rates have increased significantly,

391 further adjustments to interventions can be considered to transition back to normal life<sup>50</sup>.  
392 These policy implications may be applicable to other countries.

### 393 **4.3 Limitations**

394 There were several limitations in our study. First, RSV cases are continuously updated by  
395 the CDC, and timely data availability from each state is not always possible due to a shortage  
396 of labs and tests. Second, under-reporting and potential misdiagnosis due to clinical symptom  
397 similarities among the three viruses remain a concern<sup>51,52</sup>. Third, we did not consider  
398 sociodemographic factors that play a crucial role in disease transmission<sup>53</sup>. For example,  
399 RSV-related deaths are most common in children and the elderly in the winter of 2022<sup>54,55</sup>.  
400 Incorporating sociodemographic factors (e.g., adjusted rates based on socioeconomic status)  
401 in the space-time scan statistic might generate more accurate RR estimates. Moreover, to  
402 enhance the identification of potential multiple-demic situations and understand the  
403 underlying mechanisms contributing to spatiotemporal disparities in multi-demic risks, high  
404 spatial resolution data (i.e., county) is recommended for future study to improve usability and  
405 accuracy.

### 406 **5 Conclusion**

407 In conclusion, our study shed light on the processes that contributed to the “triple-demic”  
408 in the US states over space and time. Our approach can be utilized for continuous  
409 surveillance the "triple-demic" dynamics with the latest data, and to facilitate timely  
410 adjustments of domestic and interregional public health interventions that aimed at  
411 preventing further deterioration of the multiple-demic situation.

### 412 **Funding:**

413 This work was supported in part by National University of Singapore FY2020 START-UP  
414 GRANT under WBS A-0003623-00-00. SL was supported by the National Institute for  
415 Health (MIDAS Mobility R01AI160780) and the Bill & Melinda Gates Foundation  
416 (INV-024911). It involves data collection, analysis, and interpretations well as publication  
417 fee if applicable. We were not precluded from accessing data in the study, and we accept  
418 responsibility to submit for publication.

### 419 **Contributor:**

420 WL, QL, YZ, SL, and ZL developed the study protocol, and designed the study. QL, YZ, and  
421 YR wrote the first draft. QL obtained the data and conducted the software. YZ and WH  
422 visualized the results. WL, SL, SP, and ZL reviewed and commented on the paper. WL and  
423 SL supervised the work. All authors revised the manuscript and approved the final paper.

424 **Declaration of interests:**

425 We declare no competing interests.

426

427 **Spatiotemporal Variations of "Triple-demic" Outbreaks of**  
 428 **Respiratory Infections in the United States in the Post-COVID-19**  
 429 **Era**

430 **Appendix**

431 **Spatiotemporal patterns of space time clusters in February 2023**

432 **Table A1. Space-time univariate clusters of COVID-19, influenza, and RSV from October 2022 to**  
 433 **February 2023 (RR = relative risk).**

| Cluster | Duration              | P value | Diseases  | Observed | Expected   | RR    | Total state (N) | States (RR>1) |
|---------|-----------------------|---------|-----------|----------|------------|-------|-----------------|---------------|
| 1       | 2023.01.30-2023.02.27 | <.001   | COVID-19  | 5170     | 104695.02  | 0.049 | 1               | 0             |
| 2       | 2022.12.19-2023.02.27 | <.001   | COVID-19  | 1344668  | 1011763.56 | 1.41  | 14              | 12            |
| 3       | 2023.01.23-2023.02.27 | <.001   | COVID-19  | 310983   | 483025.72  | 0.63  | 16              | 3             |
| 4       | 2022.12.26-2023.02.27 | <.001   | COVID-19  | 230912   | 148356.35  | 1.58  | 4               | 3             |
| 1       | 2023.01.02-2023.02.27 | <.001   | influenza | 448116   | 4935213.88 | 0.081 | 13              | 3             |
| 2       | 2023.01.09-2023.02.27 | <.001   | influenza | 404088   | 4545098.70 | 0.080 | 18              | 11            |
| 1       | 2022.12.19-2023.02.27 | <.001   | RSV       | 3213     | 27901.60   | 0.10  | 15              | 1             |
| 2       | 2023.01.09-2023.02.27 | <.001   | RSV       | 5937     | 20735.85   | 0.26  | 10              | 3             |

434

435 **Table A2. Space-time multivariate clusters from October 2022 to February 2023 (RR = relative risk).**

| Cluster | Duration              | P value | Type         | Diseases  | Observed | Expected   | RR    | Total state (N) | States (RR>1) |
|---------|-----------------------|---------|--------------|-----------|----------|------------|-------|-----------------|---------------|
| 1       | 2023.01.02-2023.02.27 | <.001   | Twindemic    | RSV       | 2463     | 22900.50   | 0.096 | 13              | 1             |
|         |                       |         |              | influenza | 448116   | 4935213.88 | 0.081 |                 | 3             |
|         |                       |         |              | RSV       | 10957    | 21090.28   | 0.49  |                 | 10            |
| 2       | 2023.01.09-2023.02.27 | <.001   | Triple-demic | influenza | 404088   | 4545098.70 | 0.080 | 18              | 11            |
|         |                       |         |              | COVID-19  | 563631   | 745205.75  | 0.73  |                 | 5             |

436

437 **Table A3. Space-time univariate clusters from October 2022 to January 2023 (RR = relative risk).**

| October 2022 |                       |         |           |                |                |      |                 |               |
|--------------|-----------------------|---------|-----------|----------------|----------------|------|-----------------|---------------|
| Cluster      | Duration              | P value | Diseases  | Observed cases | Expected cases | RR   | Total state (N) | States (RR>1) |
| 1            | 2022.10.24-2022.10.31 | <.001   | COVID-19  | 73010          | 158543.20      | 0.43 | 11              | 2             |
| 2            | 2022.10.24-2022.10.31 | <.001   |           | 119601         | 70330.50       | 1.77 | 8               | 8             |
| 3            | 2022.10.31-2022.10.31 | <.001   |           | 89235          | 64616.01       | 1.41 | 10              | 8             |
| 4            | 2022.10.24-2022.10.31 | <.001   |           | 82971          | 108621.41      | 0.75 | 8               | 1             |
| 5            | 2022.10.24-2022.10.31 | <.001   |           | 2433           | 4615.73        | 0.53 | 2               | 0             |
| 1            | 2022.10.24-2022.10.31 | <.001   | Influenza | 2411008        | 500030.70      | 7.28 | 8               | 7             |
| 2            | 2022.10.31-2022.10.31 | <.001   |           | 748172         | 269284.44      | 3.02 | 11              | 6             |
| 3            | 2022.10.24-2022.10.31 | <.001   |           | 370929         | 616738.07      | 0.58 | 15              | 1             |
| 4            | 2022.10.24-2022.10.31 | <.001   |           | 24677          | 118063.99      | 0.21 | 2               | 0             |
| 5            | 2022.10.24-2022.10.31 | <.001   |           | 24743          | 111877.21      | 0.22 | 6               | 0             |
| 1            | 2022.10.24-2022.10.31 | <.001   | RSV       | 6158           | 1174.19        | 5.80 | 6               | 5             |
| 2            | 2022.10.24-2022.10.31 | <.001   |           | 2990           | 749.09         | 4.17 | 1               | 1             |
| 3            | 2022.10.24-2022.10.31 | <.001   |           | 863            | 91.25          | 9.60 | 1               | 1             |
| 4            | 2022.10.24-2022.10.31 | <.001   |           | 2717           | 5268.89        | 0.49 | 10              | 3             |

| 5                                   | 2022.10.24-2022.10.31 | <.001   |           | 1912     | 774.33     | 2.52 | 2               | 2             |
|-------------------------------------|-----------------------|---------|-----------|----------|------------|------|-----------------|---------------|
| 6                                   | 2022.10.24-2022.10.31 | <.001   |           | 487      | 134.55     | 3.64 | 1               | 1             |
| <b>October 2022 - November 2022</b> |                       |         |           |          |            |      |                 |               |
| Cluster                             | Duration              | P value |           | Observed | Expected   | RR   | Total state (N) | States (RR>1) |
| 1                                   | 2022.11.07-2022.11.28 | <.001   | COVID-19  | 6663     | 71080.24   | 0.09 | 1               | 0             |
| 2                                   | 2022.11.07-2022.11.28 | <.001   |           | 115342   | 62614.82   | 1.88 | 1               | 1             |
| 3                                   | 2022.11.21-2022.11.28 | <.001   |           | 141764   | 93142.01   | 1.55 | 5               | 3             |
| 4                                   | 2022.11.07-2022.11.28 | <.001   |           | 54274    | 96580.11   | 0.55 | 1               | 0             |
| 5                                   | 2022.11.07-2022.11.28 | <.001   |           | 74911    | 108128.23  | 0.68 | 6               | 1             |
| 6                                   | 2022.11.07-2022.11.28 | <.001   |           | 259899   | 222591.77  | 1.19 | 8               | 7             |
| 1                                   | 2022.11.07-2022.11.28 | <.001   | Influenza | 6583436  | 3064396.37 | 2.56 | 15              | 7             |
| 2                                   | 2022.11.21-2022.11.28 | <.001   |           | 3813598  | 1607061.06 | 2.62 | 14              | 8             |
| 1                                   | 2022.11.07-2022.11.28 | <.001   | RSV       | 44983    | 17172.05   | 3.47 | 16              | 10            |
| 2                                   | 2022.11.07-2022.11.28 | <.001   |           | 4231     | 14495.37   | 0.27 | 10              | 1             |
| 3                                   | 2022.11.07-2022.11.28 | <.001   |           | 6113     | 2060.83    | 3.06 | 1               | 1             |
| 4                                   | 2022.11.07-2022.11.28 | <.001   |           | 3188     | 2043.33    | 1.57 | 2               | 2             |
| <b>October 2022 - December 2022</b> |                       |         |           |          |            |      |                 |               |
| Cluster                             | Duration              | P value |           | Observed | Expected   | RR   | Total state (N) | States (RR>1) |
| 1                                   | 2022.11.21-2022.12.26 | <.001   | COVID-19  | 13853    | 123720.31  | 0.11 | 1               | 0             |
| 2                                   | 2022.12.05-2022.12.26 | <.001   |           | 526409   | 332588.83  | 1.67 | 10              | 8             |
| 3                                   | 2022.11.21-2022.12.26 | <.001   |           | 501971   | 324240.83  | 1.63 | 5               | 4             |
| 4                                   | 2022.12.26-2022.12.26 | <.001   |           | 25438    | 4281.95    | 5.97 | 1               | 0             |
| 1                                   | 2022.11.21-2022.12.26 | <.001   | Influenza | 9256761  | 5476524.48 | 1.90 | 19              | 10            |
| 2                                   | 2022.11.21-2022.12.26 | <.001   |           | 6138816  | 3135314.54 | 2.13 | 9               | 3             |
| 3                                   | 2022.12.12-2022.12.26 | <.001   |           | 537311   | 1344600.13 | 0.39 | 8               | 1             |
| 1                                   | 2022.11.21-2022.12.26 | <.001   | RSV       | 12443    | 1427.95    | 9.31 | 1               | 1             |
| 2                                   | 2022.11.21-2022.12.26 | <.001   |           | 3838     | 20019.55   | 0.17 | 10              | 0             |
| 3                                   | 2022.11.21-2022.12.26 | <.001   |           | 6907     | 1030.34    | 6.94 | 1               | 1             |
| 4                                   | 2022.11.21-2022.12.26 | <.001   |           | 7326     | 2543.82    | 2.96 | 3               | 3             |
| 5                                   | 2022.11.21-2022.12.26 | <.001   |           | 648      | 4680.20    | 0.14 | 2               | 0             |
| 6                                   | 2022.11.21-2022.12.26 | <.001   |           | 414      | 2416.27    | 0.17 | 2               | 0             |
| <b>October 2022 - January 2023</b>  |                       |         |           |          |            |      |                 |               |
| Cluster                             | Duration              | P value |           | Observed | Expected   | RR   | Total state (N) | States (RR>1) |
| 1                                   | 2022.12.05-2023.01.30 | <.001   | COVID-19  | 1293259  | 870811.86  | 1.62 | 14              | 10            |
| 2                                   | 2022.12.05-2023.01.30 | <.001   |           | 484071   | 350418.17  | 1.41 | 1               | 1             |
| 3                                   | 2023.01.02-2023.01.30 | <.001   |           | 170974   | 265773.40  | 0.63 | 16              | 2             |
| 4                                   | 2022.12.26-2023.01.30 | <.001   |           | 155047   | 93638.16   | 1.67 | 4               | 2             |
| 5                                   | 2023.01.30-2023.01.30 | <.001   |           | 6609     | 29928.87   | 0.22 | 1               | 0             |
| 1                                   | 2023.01.02-2023.01.30 | <.001   | Influenza | 366760   | 3316453.98 | 0.10 | 13              | 3             |
| 2                                   | 2023.01.09-2023.01.30 | <.001   |           | 297871   | 2748867.62 | 0.10 | 18              | 11            |
| 1                                   | 2022.12.05-2023.01.30 | <.001   | RSV       | 4768     | 27185.10   | 0.15 | 12              | 1             |
| 2                                   | 2022.12.05-2023.01.30 | <.001   |           | 9170     | 1701.19    | 5.61 | 1               | 1             |
| 3                                   | 2022.12.05-2023.01.30 | <.001   |           | 5602     | 1227.50    | 4.67 | 1               | 1             |
| 4                                   | 2023.01.02-2023.01.30 | <.001   |           | 5928     | 15433.12   | 0.36 | 8               | 3             |

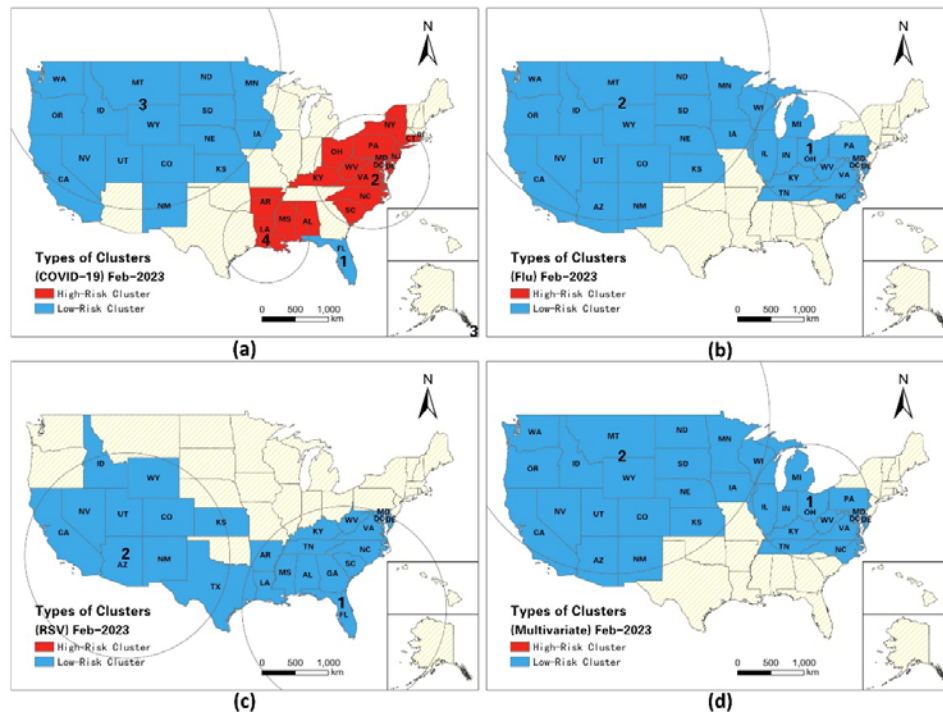

439  
440

Figure A1 Spatial Patterns of space-time clusters in February 2023

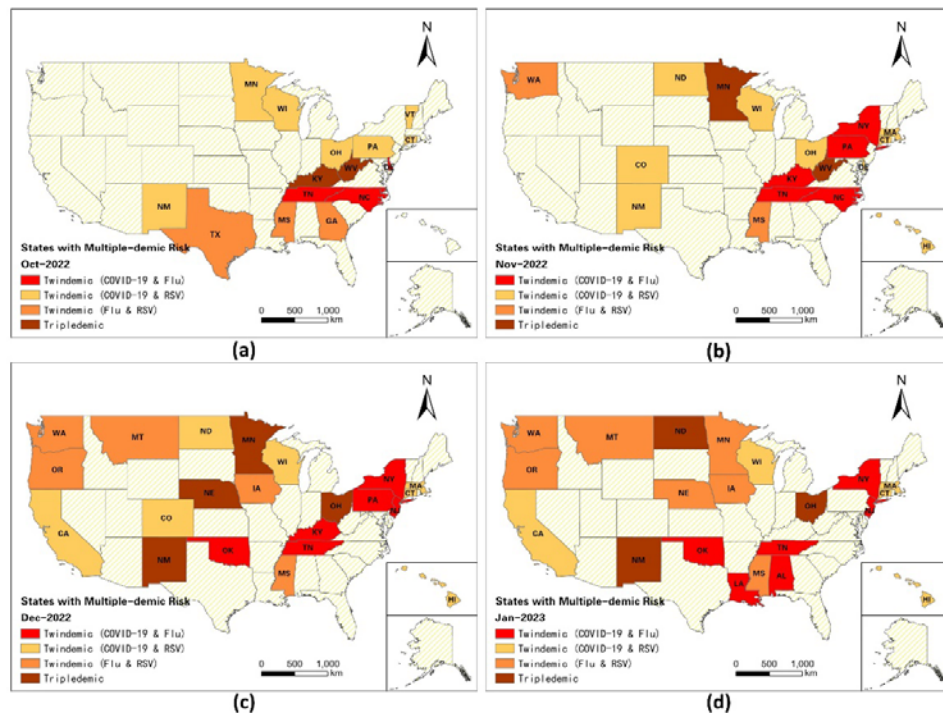

441  
442  
443  
444  
445

Figure A2. Spatiotemporal distribution of states with multiple-demic risks during the winter of 2022.

---

## Reference

- 1 Bonaccorsi G, Pierri F, Cinelli M, *et al.* Economic and social consequences of human mobility restrictions under COVID-19. *Proceedings of the National Academy of Sciences* 2020; **117**: 15530–5.
- 2 Tregoning JS, Flight KE, Higham SL, Wang Z, Pierce BF. Progress of the COVID-19 vaccine effort: viruses, vaccines and variants versus efficacy, effectiveness and escape. *Nature reviews immunology* 2021; **21**: 626–36.
- 3 Lai S, Ruktanonchai NW, Zhou L, *et al.* Effect of non-pharmaceutical interventions to contain COVID-19 in China. *nature* 2020; **585**: 410–3.
- 4 Pei S, Kandula S, Shaman J. Differential effects of intervention timing on COVID-19 spread in the United States. *Science advances* 2020; **6**: eabd6370.
- 5 Scudellari M. How the pandemic might play out in 2021 and beyond. *Nature* 2020; : 22–5.
- 6 Antonelli M, Pujol JC, Spector TD, Ourselin S, Steves CJ. Risk of long COVID associated with delta versus omicron variants of SARS-CoV-2. *The Lancet* 2022; **399**: 2263–4.
- 7 Saha S, Tanmoy AM, Tanni AA, *et al.* New waves, new variants, old inequity: a continuing COVID-19 crisis. *BMJ Global Health* 2021; **6**: e007031.
- 8 Feng L, Zhang T, Wang Q, *et al.* Impact of COVID-19 outbreaks and interventions on influenza in China and the United States. *Nature communications* 2021; **12**: 3249.
- 9 RSV, Flu, and COVID: Understanding Today’s ‘Tripleemic’. <https://www.bu.edu/sph/news/articles/2022/rsv-flu-and-covid-19-understanding-todays-tripleemic/> (accessed Feb 6, 2023).
- 10 Huang QS, Wood T, Jelley L, *et al.* Impact of the COVID-19 nonpharmaceutical interventions on influenza and other respiratory viral infections in New Zealand. *Nature communications* 2021; **12**: 1001.
- 11 The U.S. is officially in a flu epidemic, federal health officials say. They’re preparing to deploy troops and ventilators if necessary. [https://finance.yahoo.com/news/u-officially-flu-epidemic-federal-165009925.html?guccounter=1&guce\\_referrer=aHR0cHM6Ly93d3cuZ29vZ2xlLmNvbS8&guce\\_referrer\\_sig=AQAAAHyIQ6Qs\\_uEqmV0ADDniCR1LExYtzs\\_\\_enBwc6FXiETt9D5\\_tLn3nfmPj5m7KEysT9jxb92hlJxfFgWf3bDeMllaYEAOz9D7k1GHM06UpKUtpqJNxpI0Ow-BH\\_iPPIJTzdByoEenVynQ3UftunUZyQT12AjTSzOfNa6Ipe20WtFO](https://finance.yahoo.com/news/u-officially-flu-epidemic-federal-165009925.html?guccounter=1&guce_referrer=aHR0cHM6Ly93d3cuZ29vZ2xlLmNvbS8&guce_referrer_sig=AQAAAHyIQ6Qs_uEqmV0ADDniCR1LExYtzs__enBwc6FXiETt9D5_tLn3nfmPj5m7KEysT9jxb92hlJxfFgWf3bDeMllaYEAOz9D7k1GHM06UpKUtpqJNxpI0Ow-BH_iPPIJTzdByoEenVynQ3UftunUZyQT12AjTSzOfNa6Ipe20WtFO) (accessed Feb 12, 2023).
- 12 Walker AS. Just How Bad Is the ‘Tripleemic’? The New York Times. 2022; published online Dec 16. <https://www.nytimes.com/interactive/2022/12/16/us/covid-flu-rsv-tripleemic-data.html> (accessed Feb 6, 2023).
- 13 Swets MC, Russell CD, Harrison EM, *et al.* SARS-CoV-2 co-infection with influenza viruses, respiratory syncytial virus, or adenoviruses. *The Lancet* 2022; **399**: 1463–4.
- 14 Burki TK. Circulation of influenza, RSV, and SARS-CoV-2: an uncertain season ahead. *The Lancet Respiratory Medicine* 2021; **9**: e103.
- 15 Furlow B. Triple-demic overwhelms paediatric units in US hospitals. *The Lancet Child & Adolescent Health* 2022.
- 16 ‘Tripleemic’ Data Shows Cold and Flu Season Is Already Among the Worst on Record - The New York Times. <https://www.nytimes.com/interactive/2022/12/16/us/covid-flu-rsv-tripleemic-data.html>



- (accessed Feb 12, 2023).
- 17 Kimball S. U.S. faces highest flu hospitalization rate in a decade with young kids and seniors most at risk. *CNBC*. 2022; published online Nov 4. <https://www.cnn.com/2022/11/04/us-faces-highest-flu-hospitalization-rate-in-a-decade.html> (accessed Feb 12, 2023).
  - 18 COVID-19: Top news stories about the pandemic on 28 February | World Economic Forum. <https://www.weforum.org/agenda/2022/02/covid19-top-news-omicron-coronavirus-28-february-2022/> (accessed Feb 12, 2023).
  - 19 Fairbank R. RSV wave hammers hospitals—but vaccines and treatments are coming. *Nature* 2022.
  - 20 Bolourian A, Mojtahedi Z. COVID-19 and flu pandemics follow a pattern: a possible cross-immunity in the pandemic origin and graver disease in farther regions. *Archives of Medical Research* 2021; **52**: 240–1.
  - 21 Simonetti O, Martini M, Armocida E. COVID-19 and Spanish flu-18: review of medical and social parallelisms between two global pandemics. *Journal of preventive medicine and hygiene* 2021; **62**: E613.
  - 22 Rubin R. Influenza’s unprecedented low profile during COVID-19 pandemic leaves experts wondering what this flu season has in store. *Jama* 2021; **326**: 899–900.
  - 23 Luo W, Liu Z, Zhou Y, *et al.* Investigating linkages between spatiotemporal patterns of the covid-19 delta variant and public health interventions in Southeast Asia: Prospective space-time scan statistical analysis method. *JMIR Public Health and Surveillance* 2022; **8**: e35840.
  - 24 Lee SS, Wong NS. The clustering and transmission dynamics of pandemic influenza A (H1N1) 2009 cases in Hong Kong. *Journal of Infection* 2011; **63**: 274–80.
  - 25 Banu S, Hu W, Hurst C, Guo Y, Islam MZ, Tong S. Space–time clusters of dengue fever in Bangladesh. *Tropical Medicine & International Health* 2012; **17**: 1086–91.
  - 26 McNally RJQ, Feltbower RG, Parker L, Bodansky HJ, Campbell F, McKinney PA. Space–time clustering analyses of type 1 diabetes among 0-to 29-year-olds in Yorkshire, UK. *Diabetologia* 2006; **49**: 900–4.
  - 27 Desjardins MR, Whiteman A, Casas I, Delmelle E. Space-time clusters and co-occurrence of chikungunya and dengue fever in Colombia from 2015 to 2016. *Acta tropica* 2018; **185**: 77–85.
  - 28 Amin R, Hendryx M, Shull M, Bohnert A. A cluster analysis of pediatric cancer incidence rates in Florida: 2000–2010. *Statistics and Public Policy* 2014; **1**: 69–77.
  - 29 ‘Tripledeemic:’ What Happens When Flu, RSV, and COVID-19 Cases Collide? > News > Yale Medicine. <https://www.yalemedicine.org/news/tripledeemic-flu-rsv-and-covid-19> (accessed March 3, 2023).
  - 30 Dong E, Du H, Gardner L. An interactive web-based dashboard to track COVID-19 in real time. *The Lancet infectious diseases* 2020; **20**: 533–4.
  - 31 CDC. Flu Activity & Surveillance. Centers for Disease Control and Prevention. 2022; published online Jan 5. <https://www.cdc.gov/flu/weekly/fluactivitysurv.htm> (accessed Feb 12, 2023).
  - 32 RSV Census Division Trends - NREVSS | CDC. 2023; published online Feb 8. <https://www.cdc.gov/surveillance/nrevss/rsv/division.html> (accessed Feb 12, 2023).
  - 33 Goldstein E, Viboud C, Charu V, Lipsitch M. Improving the Estimation of Influenza-Related Mortality

- 
- Over a Seasonal Baseline. *Epidemiology* 2012; **23**: 829.
- 34 Bureau UC. American Community Survey (ACS). Census.gov. <https://www.census.gov/programs-surveys/acs> (accessed March 4, 2023).
- 35 Kulldorff M, Athas WF, Feurer EJ, Miller BA, Key CR. Evaluating cluster alarms: a space-time scan statistic and brain cancer in Los Alamos, New Mexico. *American journal of public health* 1998; **88**: 1377–80.
- 36 Kulldorff M, Mostashari F, Duczmal L, Katherine Yih W, Kleinman K, Platt R. Multivariate scan statistics for disease surveillance. *Statistics in medicine* 2007; **26**: 1824–33.
- 37 Kulldorff M. A spatial scan statistic. *Communications in Statistics-Theory and methods* 1997; **26**: 1481–96.
- 38 Kulldorff M, Nagarwalla N. Spatial disease clusters: detection and inference. *Statistics in medicine* 1995; **14**: 799–810.
- 39 Riepl A, Straßmayr L, Voitl P, *et al.* The surge of RSV and other respiratory viruses among children during the second COVID-19 pandemic winter season. *Frontiers in Pediatrics* 2023; **11**.
- 40 Moriyama M, Hugentobler WJ, Iwasaki A. Seasonality of respiratory viral infections. *Annual review of virology* 2020; **7**: 83–101.
- 41 Canada passes 50,000 registered COVID-19 deaths as “triple-demic” wreaks havoc on health care systems nationwide - World Socialist Web Site. <https://www.wsws.org/en/articles/2022/12/22/zobm-d22.html> (accessed Feb 27, 2023).
- 42 NHS: Excess deaths in week before Xmas highest in two years amid ‘triple-demic’ chaos | Science | News | Express.co.uk. <https://www.express.co.uk/news/science/1717579/nhs-excess-deaths-christmas-covid-flu-triple-demic> (accessed Feb 27, 2023).
- 43 Explainer: Are children in Singapore facing a ‘triple-demic’ threat of influenza, Covid-19 and RSV? TODAY. <https://www.todayonline.com/singapore/explainer-children-triple-demic-rsv-flu-covid-2064386> (accessed Feb 27, 2023).
- 44 Varela FH, Scotta MC, Polese-Bonatto M, *et al.* Absence of detection of RSV and influenza during the COVID-19 pandemic in a Brazilian cohort: likely role of lower transmission in the community. *Journal of global health* 2021; **11**.
- 45 Garg I, Shekhar R, Sheikh AB, Pal S. Impact of COVID-19 on the changing patterns of respiratory syncytial virus infections. *Infectious Disease Reports* 2022; **14**: 558–68.
- 46 Walker MD, Sulyok M. Online behavioural patterns for Coronavirus disease 2019 (COVID-19) in the United Kingdom. *Epidemiology & Infection* 2020; **148**.
- 47 Eden J-S, Sikazwe C, Xie R, *et al.* Off-season RSV epidemics in Australia after easing of COVID-19 restrictions. *Nat Commun* 2022; **13**: 2884.
- 48 Martin ET, Kuypers J, Wald A, Englund JA. Multiple versus single virus respiratory infections: viral load and clinical disease severity in hospitalized children. *Influenza and Other Respiratory Viruses* 2012; **6**: 71–7.
- 49 Mullooly JP, Bridges CB, Thompson WW, *et al.* Influenza- and RSV-associated hospitalizations among adults. *Vaccine* 2007; **25**: 846–55.

- 50 Luo W, Zhou Y, Liu Z, *et al.* Cross-regional analysis of the association between human mobility and COVID-19 infection in Southeast Asia during the transitional period of “living with COVID-19”. *Health & Place* 2023; **81**: 103000.
- 51 Bray L, Meznikova K, James D, *et al.* Misdiagnoses in the Context of Suspected Pandemic Influenza or Coronavirus Disease 2019: A Systematic Review. In: *Open Forum Infectious Diseases*. Oxford University Press US, 2022: ofac515.
- 52 Flu or COVID-19? Convergence of Two Viruses Creates Risk of Diagnostic Errors. <https://www.thedoctors.com/articles/flu-rsv-or-covid-19-convergence-of-three-viruses-creates-risk-of-diagnostic-errors/> (accessed Feb 27, 2023).
- 53 Xu F, Beard K. A comparison of prospective space-time scan statistics and spatiotemporal event sequence based clustering for COVID-19 surveillance. *PloS One* 2021; **16**: e0252990.
- 54 Dawson-Caswell M, Muncie Jr HL. Respiratory syncytial virus infection in children. *American family physician* 2011; **83**: 141–6.
- 55 Falsey AR, Walsh EE. Respiratory syncytial virus infection in elderly adults. *Drugs & aging* 2005; **22**: 577–87.
